# Supplementary material for: Optically isotropic liquid crystal media formulated by doping star-shaped cyclic oligosiloxane liquid crystal surfactants in twin nematic liquid crystals
Source: Royal Society of Chemistry journal article supplement (doi:10.1039/c5sm00005j), 2015-01-01
Supplement: c5sm00005j1.pdf [file c5sm00005j1.pdf]

Electronic Supplementary Information

## Optically Isotropic Liquid Crystal Media Formulated by Doping Star-shaped Cyclic Oligosiloxane Liquid Crystal Surfactants in Twin Nematic Liquid Crystals

Namil Kim,<sup>b</sup> Dae-Yoon Kim,<sup>a</sup> Minwook Park,<sup>a</sup> Yu-Jin Choi,<sup>a</sup> Soeun Kim,<sup>a</sup> Seung Hee Lee,<sup>c</sup> and Kwang-Un Jeong<sup>a,\*</sup>

<sup>a</sup> Department of Polymer-Nano Science and Technology, Chonbuk National University, Jeonju, Jeonbuk, 561-756, Korea. E-mail: kujeong@jbnu.ac.kr

<sup>b</sup> Smart Materials R&D Center, Korea Automotive Technology Institute, Cheonan, Chungnam 330-912, Korea.

<sup>c</sup> Department of BIN Fusion Technology, Chonbuk National University, Jeonju, 561-756, Korea.

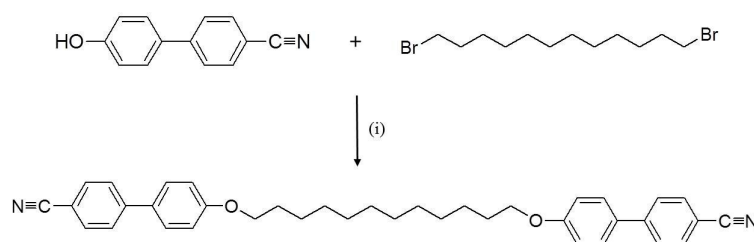

**Fig. S1** Synthetic scheme of DiLC molecule and reaction conditions: (i)  $K_2CO_3$ ,  $N,N$ -dimethylformamide,  $130\text{ }^\circ\text{C}$ , 72 h.

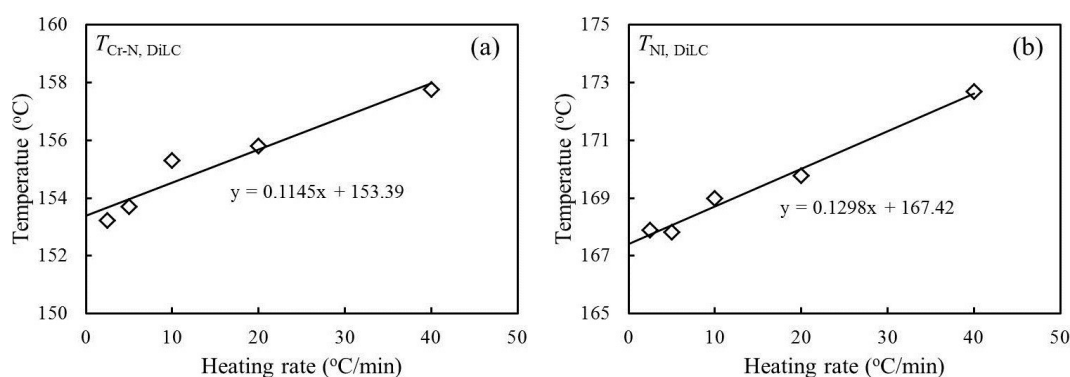

**Fig. S2** Variation of (a) crystal-nematic ( $T_{Cr-N}$ ) and (b) nematic-isotropic ( $T_{NI}$ ) transition temperatures of neat DiLC depending on the scanning rates. Transition temperatures at equilibrium state have been estimated by extrapolating the transition points to zero.
